# Supplementary material for: Post-mortem brain analysis reveals altered monoaminergic system in the dorsolateral prefrontal cortex and hippocampus in chronic schizophrenia
Source: Research Square preprint supplement (doi:10.21203/rs.3.rs-6958024/v1), 2025-07-23
Supplement: Supplementary file 1 [file 406675ae8c91f98532fa73ba.docx]

*Supplemental information for*

**Post-mortem brain analysis reveals altered monoaminergic system in the dorsolateral prefrontal cortex and hippocampus in chronic schizophrenia**

Anna Di Maio1,2,*, Valentina Bassareo3,*, Giuseppe De Simone4,5,*, Amber Hassan1,7, Alessandro Bertolino8,9, Francesco Errico1,6, Antonio Rampino8,9, Andrea de Bartolomeis4, Alessandro Usiello1,2,7,@

1CEINGE Biotecnologie Avanzate “Franco Salvatore”, Naples, Italy;

2Department of Environmental, Biological and Pharmaceutical Sciences and Technologies, Università degli Studi della Campania "Luigi Vanvitelli", Caserta, Italy;

3Department of Biomedical Sciences, University of Cagliari, Monserrato, Italy;

4Section of Psychiatry, Laboratory of Translational and Molecular Psychiatry and Unit of Treatment-Resistant Psychosis, Department of Neuroscience, Reproductive Sciences and Odontostomatology, University Medical School of Naples "Federico II", Naples, Italy;

5Departament de Medicina, Facultat de Medicina i Ciències de la Salut, Institut de Neurociències, Universitat de Barcelona, Barcelona, Spain; Bipolar and Depressive Disorders Unit, Hospìtal Clinic de Barcelona, Barcelona, Spain; Institut d'Investigacions Biomèdiques August Pi i Sunyer, Barcelona, Spain;

6 Dipartimento di Agraria, Università degli Studi di Napoli “Federico II”, Portici, Italy;

7European School of Molecular Medicine, University of Milan, Italy;

8Psychiatric Neuroscience Group, Department of Translational Biomedicine and Neuroscience (DiBraiN), University of Bari “Aldo Moro”, Bari, Italy;

9U.O.C. Psichiatria Universitaria, Azienda Ospedaliero-Universitaria Consorziale Policlinico, Bari, Italy.

*These authors contributed equally to this work.

@ Corresponding author:

Alessandro Usiello, PhD. Department of Environmental, Biological and Pharmaceutical Sciences and Technologies, University of Campania “Luigi Vanvitelli”- Via A. Vivaldi, 43, 81100 - Caserta, Italy and CEINGE Biotecnologie Avanzate Franco Salvatore, Naples, Italy. E-mail: [usiello@ceinge.unina.it](mailto:usiello@ceinge.unina.it).

**Supplementary Table 1.** HPLC levels of monoamines and their precursors/derivatives in the *post-mortem* dorsolateral prefrontal cortex of schizophrenia patients and controls.

| **Monoamines** | **CTRL** |  | **SCZ** |  | **Statistics** |  |
| --- | --- | --- | --- | --- | --- | --- |
|  | **Median [IQRmin; IQRmax]** | **No.** | **Median [IQRmin; IQRmax]** | **No.** | **F(df1,df2); p-value raw** | **p-value adjusted** |
| **5-HT** | 445.4 [349.3; 648.43] | 19 | 418.32 [273.09; 882.57] | 20 | F(1,35) = 0.0165; p-value = 0.8985 | 1 |
| **5-HIAA** | 735.19 [475.48; 1171.72] | 19 | 382.85 [152.38; 844.51] | 20 | F(1,35) = 1.0989; p-value = 0.3017 | 1 |
| **5-HIAA/5-HT** | 1.4 [0.81; 3.34] | 19 | 0.55 [0.35; 1.71] | 20 | F(1,35) = 0.7189; p-value = 0.4023 | 1 |
| **HVA** | 228.06 [207.55; 293.09] | 19 | 224.48 [182.22; 266.69] | 20 | F(1,35) = 0.3243; p-value = 0.5727 | 1 |
| **DOPAC** | 43.13 [28.72; 84.9] | 19 | 232.83 [72.05; 438.1] | 19 | F(1,34) = 0.9538; p-value = 0.3357 | 1 |
| **DA** | 78.7 [65.9; 99.49] | 19 | 80.39 [66.22; 100.79] | 20 | F(1,35) = 0.6264; p-value = 0.4340 | 1 |
| **HVA/DA** | 3.01 [2.2; 3.81] | 19 | 2.55 [1.94; 3.36] | 19 | F(1,34) = 0.4904; p-value = 0.4885 | 1 |
| **DOPAC/DA** | 0.61 [0.43; 1.13] | 19 | 2.36 [1.14; 3.5] | 18 | F(1,33) = 0.7179; p-value = 0.4029 | 1 |
| **NE** | 51.66 [44.09; 66.64] | 18 | 52.31 [31.02; 83.26] | 20 | F(1,34) = 0.5738; p-value = 0.45399 | 1 |

Data are shown as median with Interquartile Range (first-third quartile). Amino acids levels are expressed as pmol/g of tissue, while the ratios are expressed as percentages (%). Statistical comparisons of catecholamines levels between groups were performed by ANCOVA models, including age and PMI as covariates. To account for multiple comparisons, p-values were corrected using the Bonferroni method. CTRL: control; SCZ: schizophrenia; No: Number; IQR: Interquartile Range; df: degrees of freedom.

**Supplementary Table 2.** HPLC levels of monoamines and their precursors/derivatives in the *post-mortem* hippocampus of schizophrenia patients and controls.

| **Monoamines** | **CTRL** |  | **SCZ** |  | **Statistics** |  |
| --- | --- | --- | --- | --- | --- | --- |
|  | **Median [IQRmin; IQRmax]** | **No.** | **Median [IQRmin; IQRmax]** | **No.** | **F(df1,df2); p-value raw*** | **p-value adjusted** |
| **5-HT** | 928.76 [728.04; 1203.36] | 18 | 996.66 [748.59; 1282.66] | 20 | F(1,34) = 2.9126; p-value = 0.09701 | 0.87 |
| **5-HIAA** | 927.41 [556.31; 1110.23] | 18 | 873.1 [550.18; 1193.36] | 20 | F(1,34) = 8.7221; p-value = 0.005668 | 0.054 |
| **5-HIAA/5-HT** | 0.88 [0.67; 1.43] | 18 | 0.82 [0.65; 0.98] | 20 | F(1,34) = 0.4758; p-value = 0.4950 | 1 |
| **HVA** | 266.19 [232.41; 303.38] | 18 | 371.23 [268.42; 470.06] | 20 | F(1,34) = 4.9073; p-value = 0.03355 | 0.3 |
| **DOPAC** | 126.95 [69.35; 217.25] | 18 | 117.81 [66.26; 302.64] | 20 | F(1,34) = 0.2307; p-value = 0.6341 | 1 |
| **DA** | 86.58 [51.95; 306.58] | 18 | 96.39 [62.23; 297.78] | 20 | F(1,34) = 0.0031; p-value = 0.9558 | 1 |
| **HVA/DA** | 2.15 [0.99; 4.55] | 16 | 2.51 [1.03; 6.94] | 19 | F(1,31) = 2.5781; p-value = 0.1185 | 1 |
| **DOPAC/DA** | 0.8 [0.33; 1.66] | 16 | 0.78 [0.24; 2.46] | 19 | F(1,31) = 0.3177; p-value = 0.5770 | 1 |
| **NE** | 153.69 [66.58; 413.63] | 18 | 65.53 [41.97; 126.53] | 20 | F(1,34) = 2.3340; p-value = 0.1358 | 1 |

Data are shown as median with Interquartile Range (first-third quartile). Amino acids levels are expressed as pmol/g of tissue, while the ratios are expressed as percentages (%). Statistical comparisons of catecholamines levels between groups were performed by ANCOVA models, including age and PMI as covariates. To account for multiple comparisons, p-values were corrected using the Bonferroni method. CTRL: control; SCZ: schizophrenia; No: Number; IQR: Interquartile Range; df: degrees of freedom.

**Supplementary Table 3.** Protein expression levels of MAO-A, MAO-B and COMT isoforms in the *post-mortem* dorsolateral prefrontal cortex and hippocampus of schizophrenia patients and controls.

| **Dorsolateral prefrontal cortex** | | | | | |
| --- | --- | --- | --- | --- | --- |
| **Enzymes** | **CTRL** |  | **SCZ** |  | **Statistics** |
|  | **Median [IQRmin; IQRmax]** | **No.** | **Median [IQRmin; IQRmax]** | **No.** | **F(df1,df2); p-value raw** |
| **mb-COMT** | 82.78 [58.45; 120.3] | 20 | 64.97 [51.77; 90.5] | 19 | F(1,35) = 1.0880; p-value = 0.3041 |
| **s-COMT** | 88.12 [63.1; 106.61] | 20 | 67.88 [50.58; 94.81] | 19 | F(1,35) = 0.8495; p-value = 0.36299 |
| **MAO-A** | 91.27 [76.04; 111.42] | 20 | 91.01 [66.11; 131.41] | 19 | F(1,35) = 1.0555; p-value = 0.31128 |
| **MAO-B** | 104.23 [77.25; 119.15] | 20 | 91.18 [74.92; 118.38] | 20 | F(1,36) = 0.3468; p-value = 0.5595797 |
| **Hippocampus** | | | | | |
| **Enzymes** | **CTRL** |  | **SCZ** |  | **Statistics** |
|  | **Median [IQRmin; IQRmax]** | **No.** | **Median [IQRmin; IQRmax]** | **No.** | **F(df1,df2); p-value raw** |
| **mb-COMT** | 91.81 [65.85; 126.23] | 17 | 84.84 [71.31; 92.95] | 18 | F(1,31) = 0.0604; p-value = 0.8076 |
| **s-COMT** | 79.95 [64.8; 116.7] | 17 | 85.64 [55.76; 100.44] | 18 | F(1,31) = 0.5191; p-value = 0.47663 |
| **MAO-A** | 89.85 [77.61; 115.53] | 17 | 85.56 [61.86; 119.96] | 18 | F(1,31) = 0.0268; p-value = 0.87101 |
| **MAO-B** | 104.14 [83.22; 126.06] | 18 | 91.56 [77.97; 114.82] | 20 | F(1,34) = 0.4310; p-value = 0.515914 |

Data are shown as median with Interquartile Range (first-third quartile). Proteins variations are expressed as a percentage relative to the control group. Statistical comparisons of enzymes levels between groups were performed by ANCOVA models, including age and PMI as covariates. CTRL: control; SCZ: schizophrenia; No: Number; IQR: Interquartile Range; df: degrees of freedom.

**Supplementary Table 4**. Comparison of pairwise correlations of monoamines and metabolites in the *post-mortem* dorsolateral prefrontal cortex.

| **Var1** | **Var2** | **ES** | **P_Value** | **P_Value_adj** |
| --- | --- | --- | --- | --- |
| **5-HT** | **5-HIAA** | 0.3 | 0.404 | 1 |
| **5-HT** | **HVA** | -0.347 | 0.335 | 1 |
| **5-HT** | **NE** | -0.207 | 0.565 | 1 |
| **5-HT** | **DOPAC** | -0.977 | 0.007 | 0.042 |
| **5-HT** | **DA** | -0.508 | 0.158 | 0.948 |
| **5-HIAA** | **HVA** | -0.2 | 0.579 | 1 |
| **5-HIAA** | **NE** | 0.177 | 0.623 | 1 |
| **5-HIAA** | **DOPAC** | 0.643 | 0.074 | 0.444 |
| **5-HIAA** | **DA** | -0.015 | 0.967 | 1 |
| **HVA** | **NE** | 0.339 | 0.346 | 1 |
| **HVA** | **DOPAC** | 0.045 | 0.901 | 1 |
| **HVA** | **DA** | 0.549 | 0.127 | 0.762 |
| **NE** | **DOPAC** | 0.106 | 0.768 | 1 |
| **NE** | **DA** | 1.068 | 0.003 | 0.018 |
| **DOPAC** | **DA** | -0.12 | 0.738 | 1 |

Differential correlations between SCZ patients and controls were identified with Fisher’s z-test followed by modified Bonferroni method according to the Gao method Bonferroni method. ES effect sizes (Cohen’s q).

**Supplementary Table 5**. Comparison of pairwise correlations of monoamines and metabolites in the *post-mortem* hippocampus.

| **Var1** | **Var2** | **ES** | **P_Value** | **P_Value_adj** |
| --- | --- | --- | --- | --- |
| **5-HT** | **5-HIAA** | -1.02 | 0.004 | 0.024 |
| **5-HT** | **HVA** | -0.478 | 0.177 | 1 |
| **5-HT** | **NE** | 0.428 | 0.227 | 1 |
| **5-HT** | **DOPAC** | 0.939 | 0.008 | 0.048 |
| **5-HT** | **DA** | 0.186 | 0.6 | 1 |
| **5-HIAA** | **HVA** | -0.422 | 0.234 | 1 |
| **5-HIAA** | **NE** | 0.555 | 0.117 | 0.702 |
| **5-HIAA** | **DOPAC** | -0.068 | 0.848 | 1 |
| **5-HIAA** | **DA** | 0.485 | 0.171 | 1 |
| **HVA** | **NE** | 0.89 | 0.012 | 0.072 |
| **HVA** | **DOPAC** | 0.127 | 0.72 | 1 |
| **HVA** | **DA** | 0.335 | 0.344 | 1 |
| **NE** | **DOPAC** | -0.568 | 0.109 | 0.654 |
| **NE** | **DA** | -0.641 | 0.07 | 0.42 |
| **DOPAC** | **DA** | -0.346 | 0.329 | 1 |

Differential correlations between SCZ patients and controls were identified with Fisher’s z-test followed by modified Bonferroni method according to the Gao method. ES effect sizes (Cohen’s q).
